# Supplementary material for: Release of STK24/25 suppression on MEKK3 signaling in endothelial cells confers cerebral cavernous malformation
Source: JCI journal article supplement (doi:10.1172/jci.insight.160372), 2023-01-24
Supplement: sd1 [file 1]

You are being redirected.
