# Supplementary material for: Release of STK24/25 suppression on MEKK3 signaling in endothelial cells confers cerebral cavernous malformation
Source: JCI journal article supplement (doi:10.1172/jci.insight.160372), 2023-01-24
Supplement: sd1 [file 1]

## **Supplementary Materials**

**Supplemental Table 1-2**

**Supplemental Figure 1-9**

## Supplemental Tables

**Supplemental Table 1. Offspring of *Tie2Cre;Stk24<sup>fl/fl</sup>25<sup>fl/+</sup>* x *Stk24<sup>fl/fl</sup>Stk25<sup>fl/fl</sup>* matings at various developmental stages. No live *Tie2Cre;Stk24<sup>fl/fl</sup>25<sup>fl/fl</sup>* embryos were observed after E11.**

|                                                                  | <b>E9-E9.5</b> | <b>E10-E10.5</b>    | <b>E11.5</b>     | <b>P1</b> |
|------------------------------------------------------------------|----------------|---------------------|------------------|-----------|
| <i>Stk24<sup>fl/fl</sup>Stk25<sup>fl/+</sup></i>                 | 26             | 27                  | 10               | 6         |
| <i>Stk24<sup>fl/fl</sup>Stk25<sup>fl/fl</sup></i>                | 19             | 23                  | 12               | 4         |
| <i>Tie2Cre;Stk24<sup>fl/fl</sup>Stk25<sup>fl/+</sup></i>         | 11             | 22                  | 9                | 3         |
| <b><i>Tie2Cre;Stk24<sup>fl/fl</sup>Stk25<sup>fl/fl</sup></i></b> | <b>19</b>      | <b>22 (13 dead)</b> | <b>14 (dead)</b> | <b>0</b>  |
| Total                                                            | 75             | 94                  | 45               | 13        |

**Supplemental Table 2. Offspring of *Tie2Cre;Stk24<sup>fl/+</sup>25<sup>fl/fl</sup>* x *Stk24<sup>fl/fl</sup>Stk25<sup>fl/fl</sup>* matings at various developmental stages. No live *Tie2Cre;Stk24<sup>fl/fl</sup>25<sup>fl/fl</sup>* embryos were observed after E11.**

|                                                                  | <b>E9-E9.5</b> | <b>E11</b>      | <b>E12-E12.5</b> | <b>E18.5</b> | <b>P1</b> |
|------------------------------------------------------------------|----------------|-----------------|------------------|--------------|-----------|
| <i>Stk24<sup>fl/+</sup>Stk25<sup>fl/fl</sup></i>                 | 13             | 8               | 2                | 4            | 7         |
| <i>Stk24<sup>fl/fl</sup>Stk25<sup>fl/fl</sup></i>                | 12             | 7               | 5                | 5            | 9         |
| <i>Tie2Cre;Stk24<sup>fl/+</sup>Stk25<sup>fl/fl</sup></i>         | 16             | 6               | 5                | 3            | 5         |
| <b><i>Tie2Cre;Stk24<sup>fl/fl</sup>Stk25<sup>fl/fl</sup></i></b> | <b>10</b>      | <b>6 (dead)</b> | <b>0</b>         | <b>0</b>     | <b>0</b>  |
| Total                                                            | 51             | 27              | 12               | 12           | 21        |

## Supplemental Figures

### Supplemental Figure 1

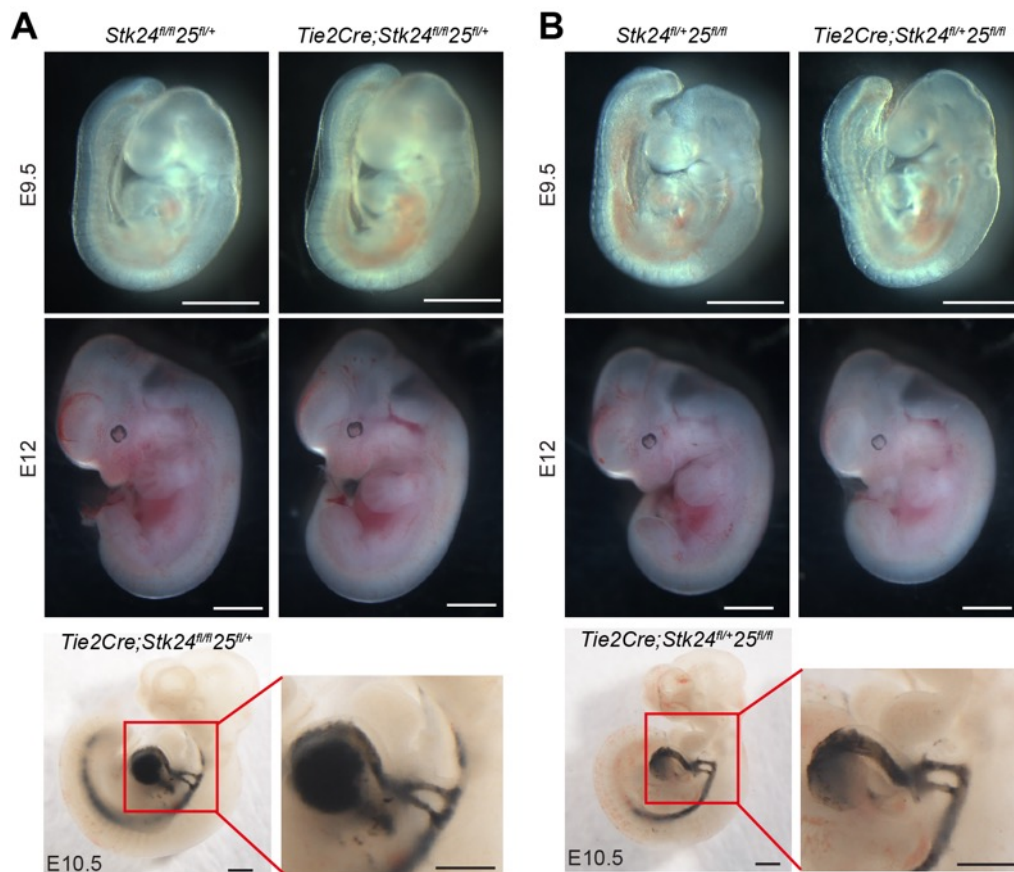

**Fig. S1. Normal gross development of *Stk24* deficient or *Stk25* deficient embryos. A)** Stereomicroscopic images of control and *Stk24* deficient embryos at E9.5 and E12. Scale bars, 1 mm. Indian ink injected hearts show normal patterning of BAA and DA. Scale bars, 500 μm. **B)** Stereomicroscopic images of control and *Stk25* deficient embryos at E9.5 and E12. Scale bars, 1 mm. Indian ink injected hearts show normal patterning of BAA and DA (n=3 for *Stk24* deficient and *Stk25* deficient E10.5 embryos). Scale bars, 500 μm.

## Supplemental Figure 2

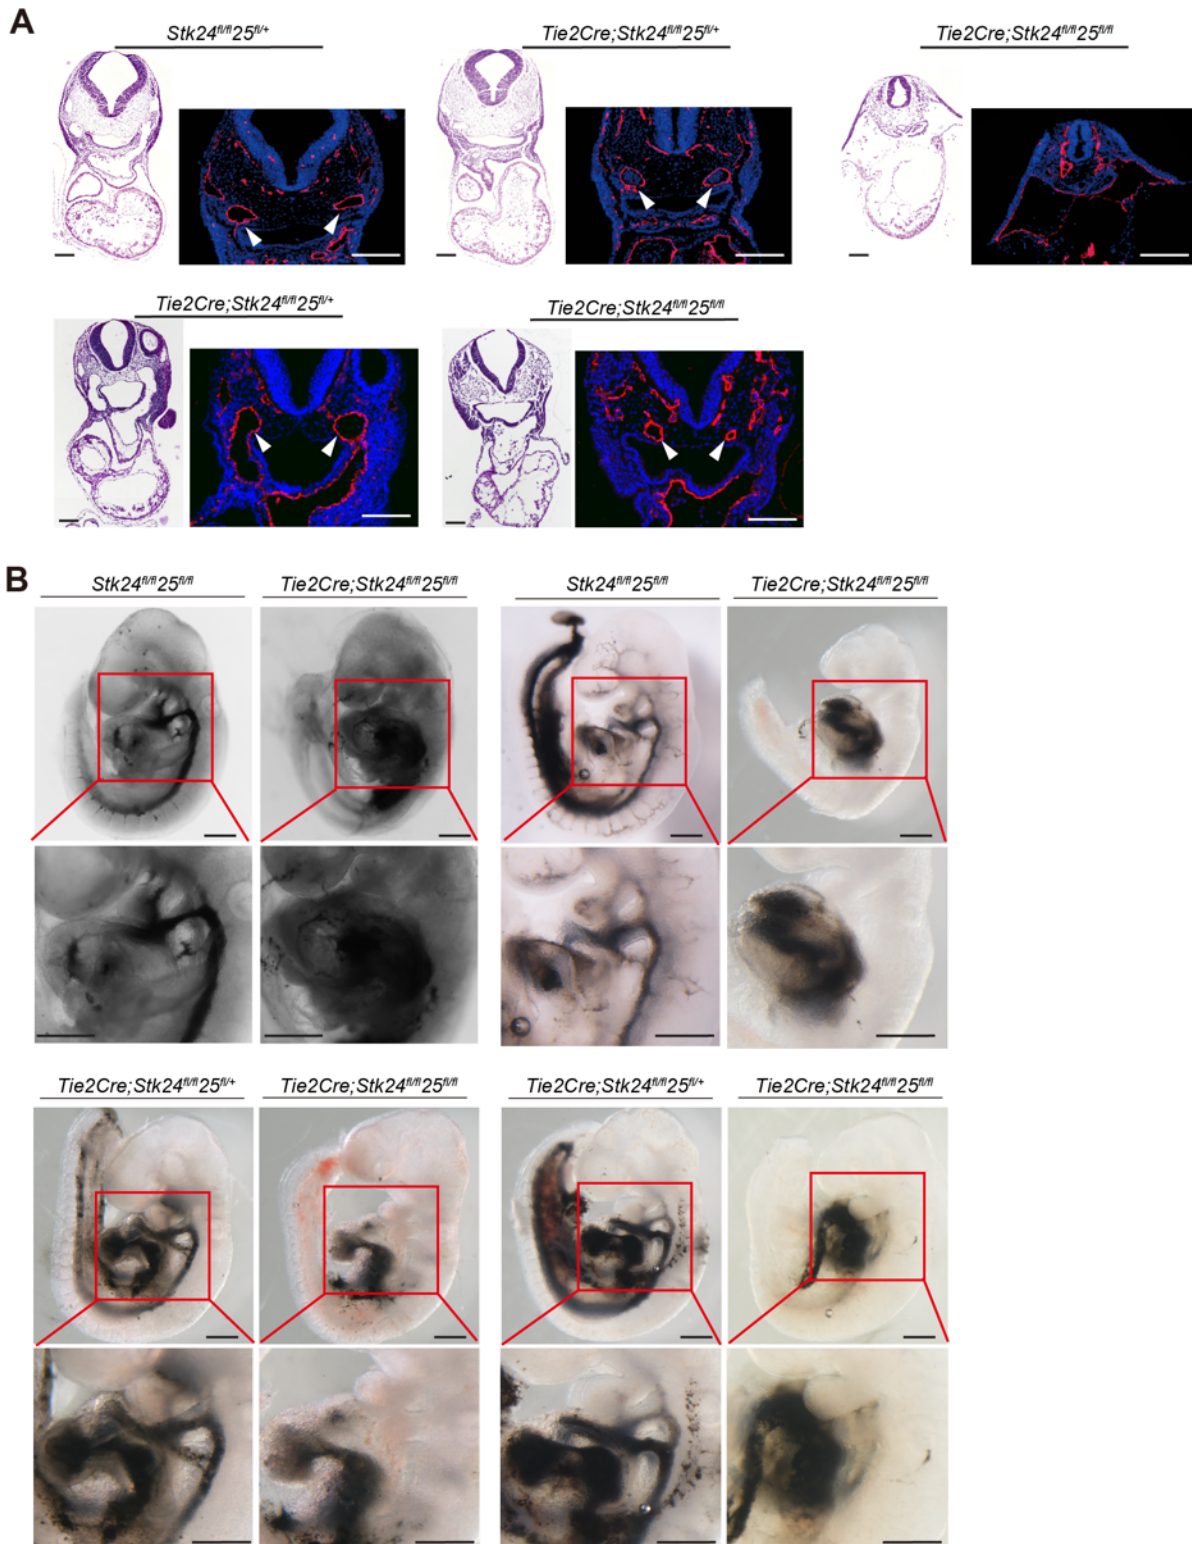

**Fig. S2. Deletion of *Stk24* and *Stk25* in endothelium results in vascular defects during embryonic development.** **A)** H&E staining and Pecan immunostaining of transverse sections of E10 embryos showing the presence of normally lumenized dorsal aortas (DA) in the control and *Tie2Cre;Stk24<sup>fl/fl</sup>Stk25<sup>fl/+</sup>* embryos, but not in the *Stk24/25<sup>dECKO</sup>* embryos. White arrows indicate DA. Scale bars, 100  $\mu$ m. **B)** Injection of Indian ink into the ventricle of embryonic hearts (E9.5) showing the establishment of a functional circulation in control and *Tie2Cre;Stk24<sup>fl/fl</sup>Stk25<sup>fl/+</sup>* embryos that was inhibited in the *Stk24/25<sup>dECKO</sup>* embryos. Scale bars, 500  $\mu$ m.



### Supplemental Figure 3

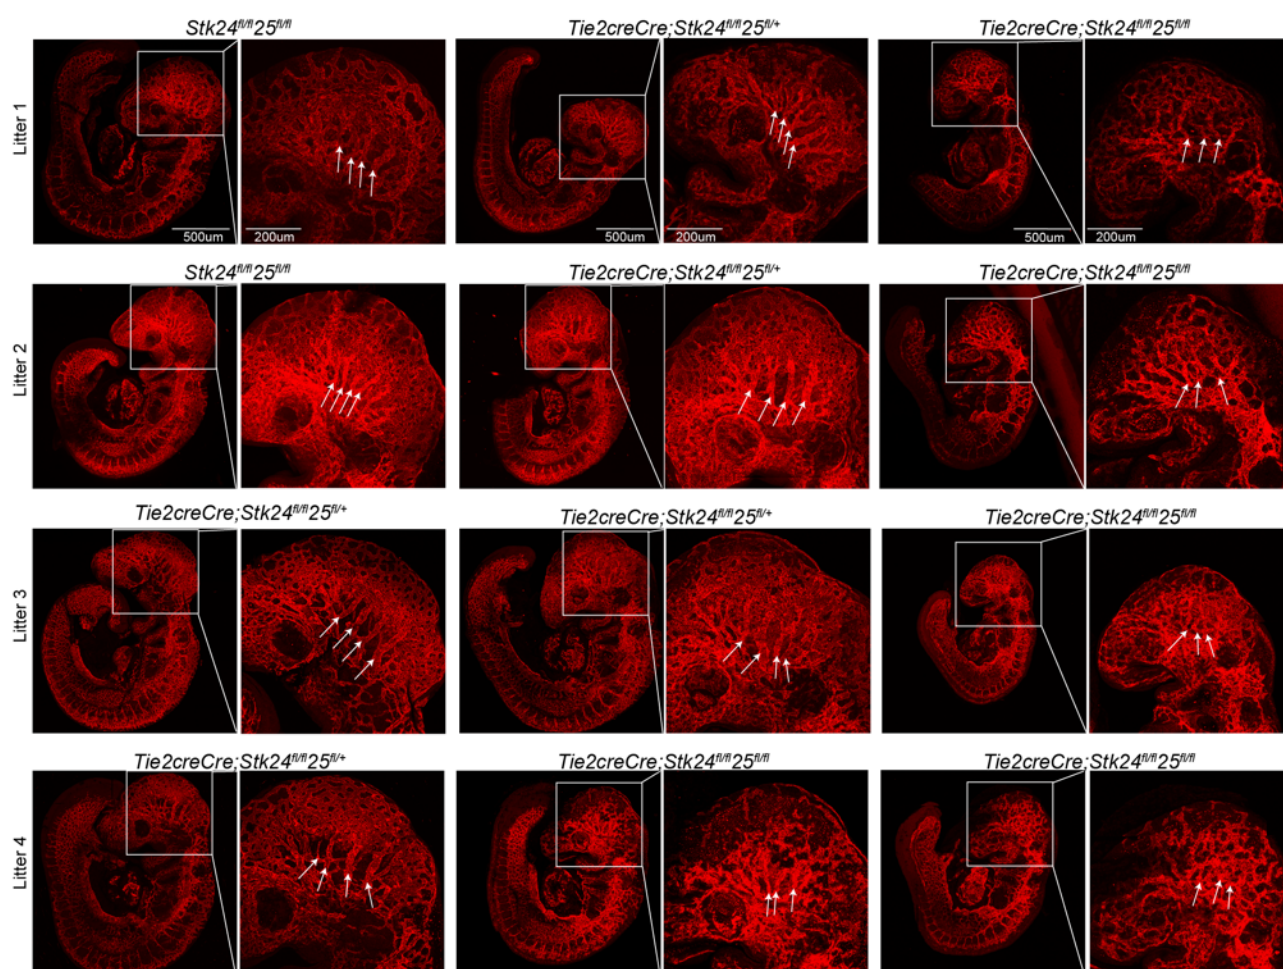

**Fig. S3. Deletion of *Stk24* and *Stk25* in endothelium results in impaired vascular patterning during embryonic development.** Whole-mount immunostainings of embryos with the endothelial marker endoglin in the brain of the E9.5 *Stk24/25<sup>ΔECKO</sup>* embryos and its *Stk24<sup>fl/fl</sup>Stk25<sup>fl/fl</sup>* and/or *Tie2Cre;Stk24<sup>fl/fl</sup>Stk25<sup>fl/+</sup>* littermate controls. White arrows indicate regions of vascular patterning. Scale bars represent 500 μm in low magnification images, and 200 μm in enlarged images.

## Supplemental Figure 4

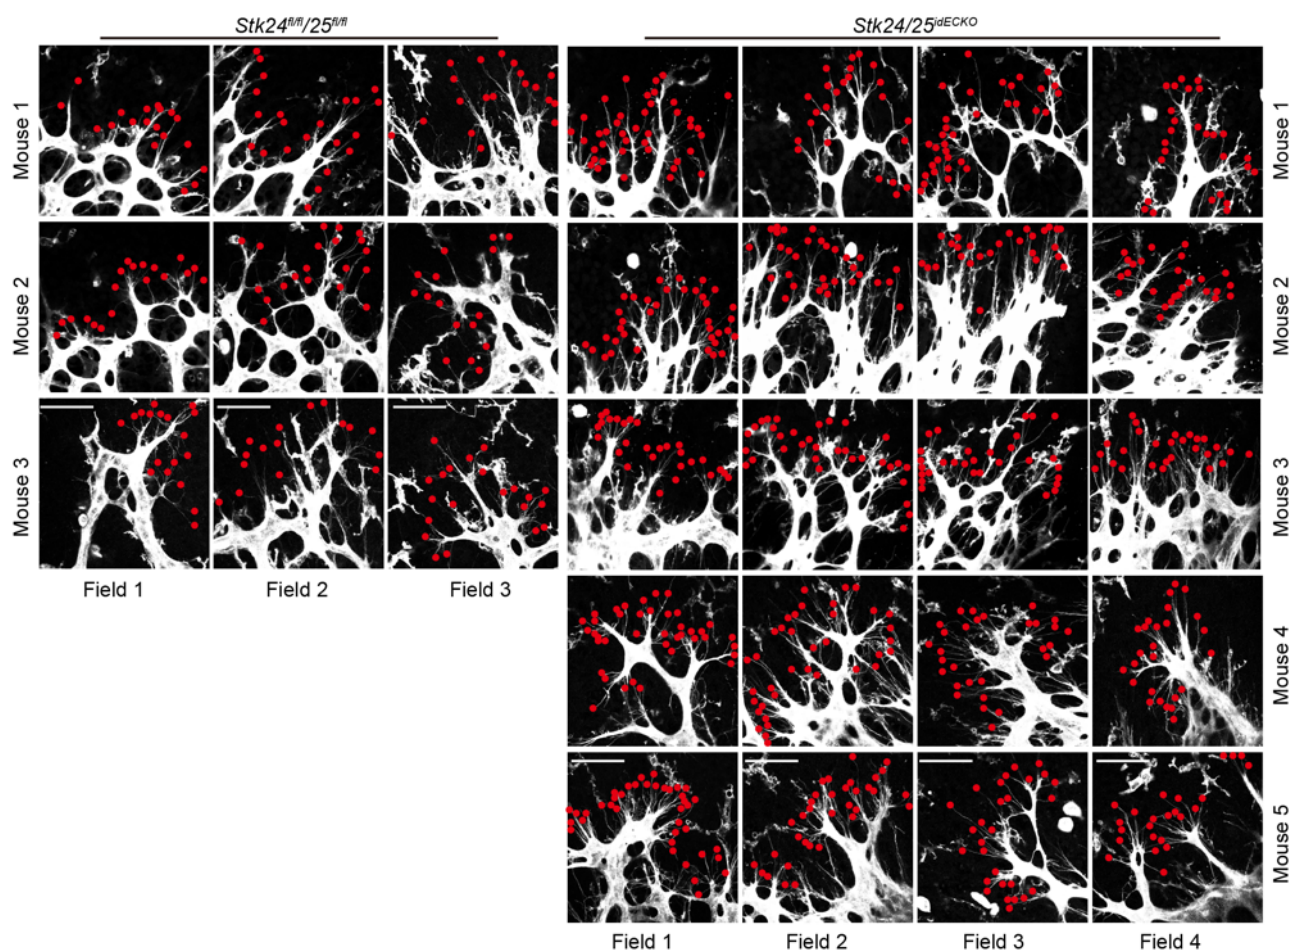

**Fig.S4. Increased filopodia numbers in *Stk24* and *Stk25* deficient mice.** Confocal images of P6 retinal lobes stained with IsoB4 in the *Stk24/25<sup>idEKO</sup>* mice (n=5) compared to the *Stk24<sup>fl/fl</sup>Stk25<sup>fl/fl</sup>* mice (n=3). The red dots denote filopodia in the vascular front. Scale bars, 100  $\mu$ m. Three fields were quantified for each control retina while four fields were quantified for each *Stk24/25<sup>idEKO</sup>* mouse.



## Supplemental Figure 5

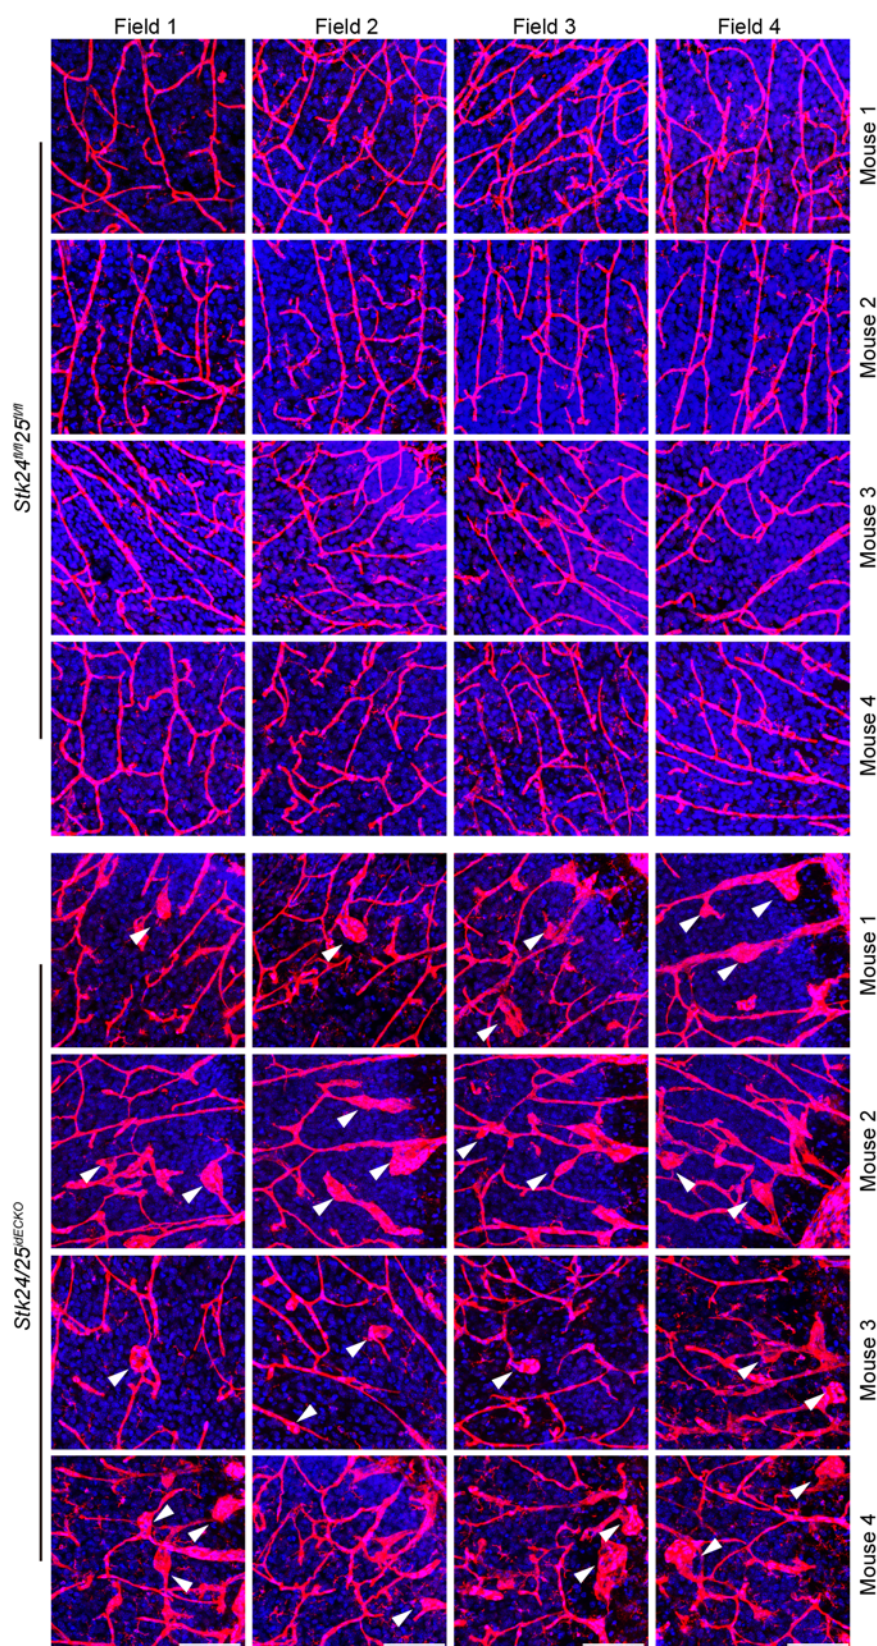

**Fig. S5. Deletion of *Stk24* and *Stk25* in endothelium of new born pups resulted in malformed vessels in the cerebrum.** Confocal images of IsoB4 staining in the cerebral cortical vasculature of P8 control and *Stk24/25<sup>idECKO</sup>* pups. The white arrows indicate the malformed cavernous vessels. Scale bars, 100  $\mu$ m.



## Supplemental Figure 6

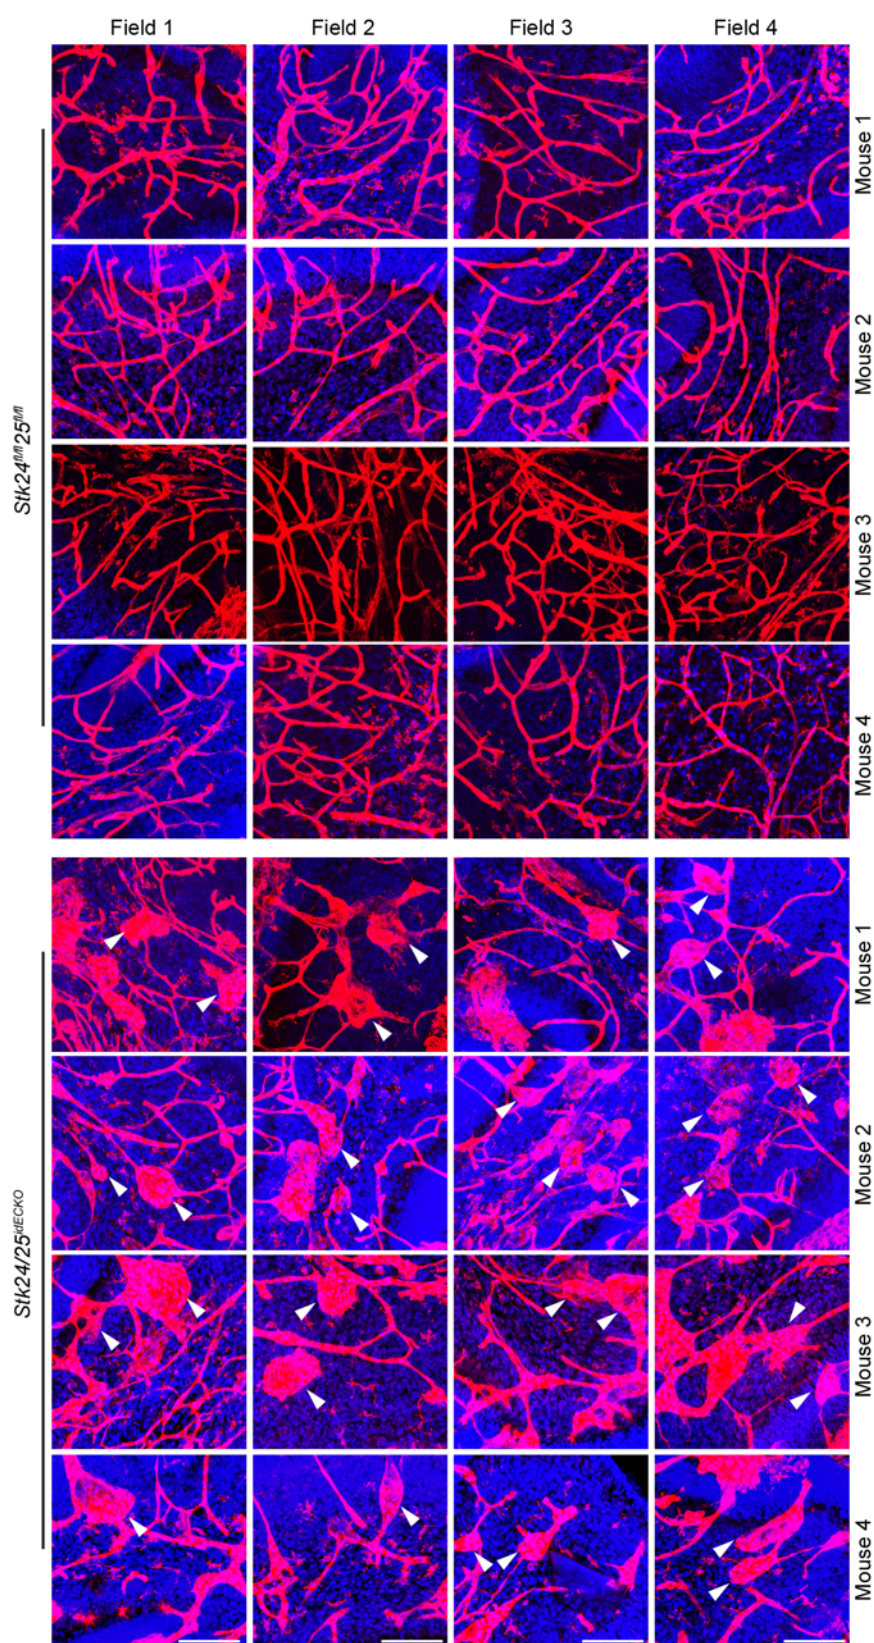

**Fig. S6. Deletion of *Stk24* and *Stk25* in endothelium of new born pups resulted in malformed vessels in the cerebellum.** Confocal images of IsoB4 staining in the cerebellum vasculature of P8 control and *Stk24/25<sup>idECKO</sup>* pups. Cavernous vessels in the *Stk24/25<sup>idECKO</sup>* mice are indicated by the white arrows. Scale bars, 100  $\mu$ m.

## Supplemental Figure 7

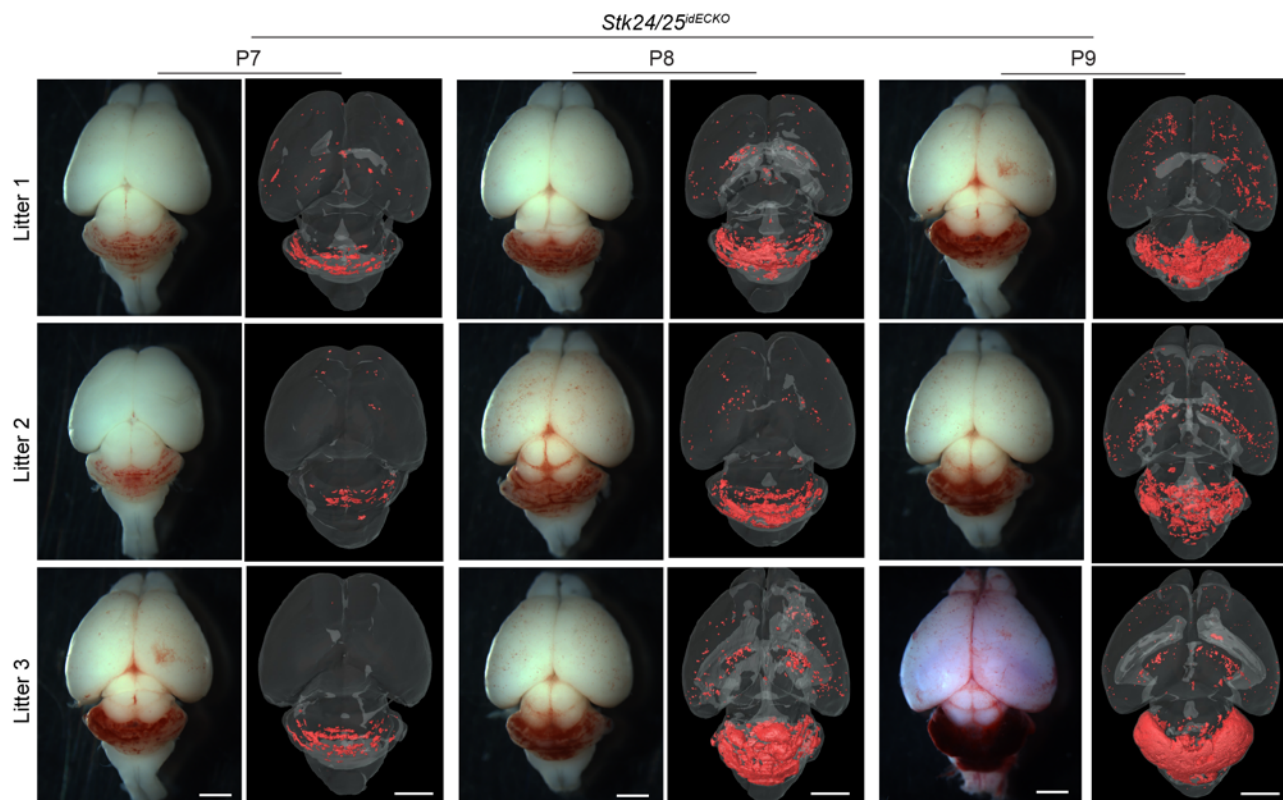

**Fig. S7. Progressive lesion development in the *Stk24/25<sup>idECKO</sup>* mice.** Stereomicroscopic images and micro-CT images of CCM lesions in the *Stk24/25<sup>idECKO</sup>* littermates at P7, P8 and P9 after induction at P2 (n=3 for each time point). Scale bars, 2 mm.



## Supplemental Figure 8

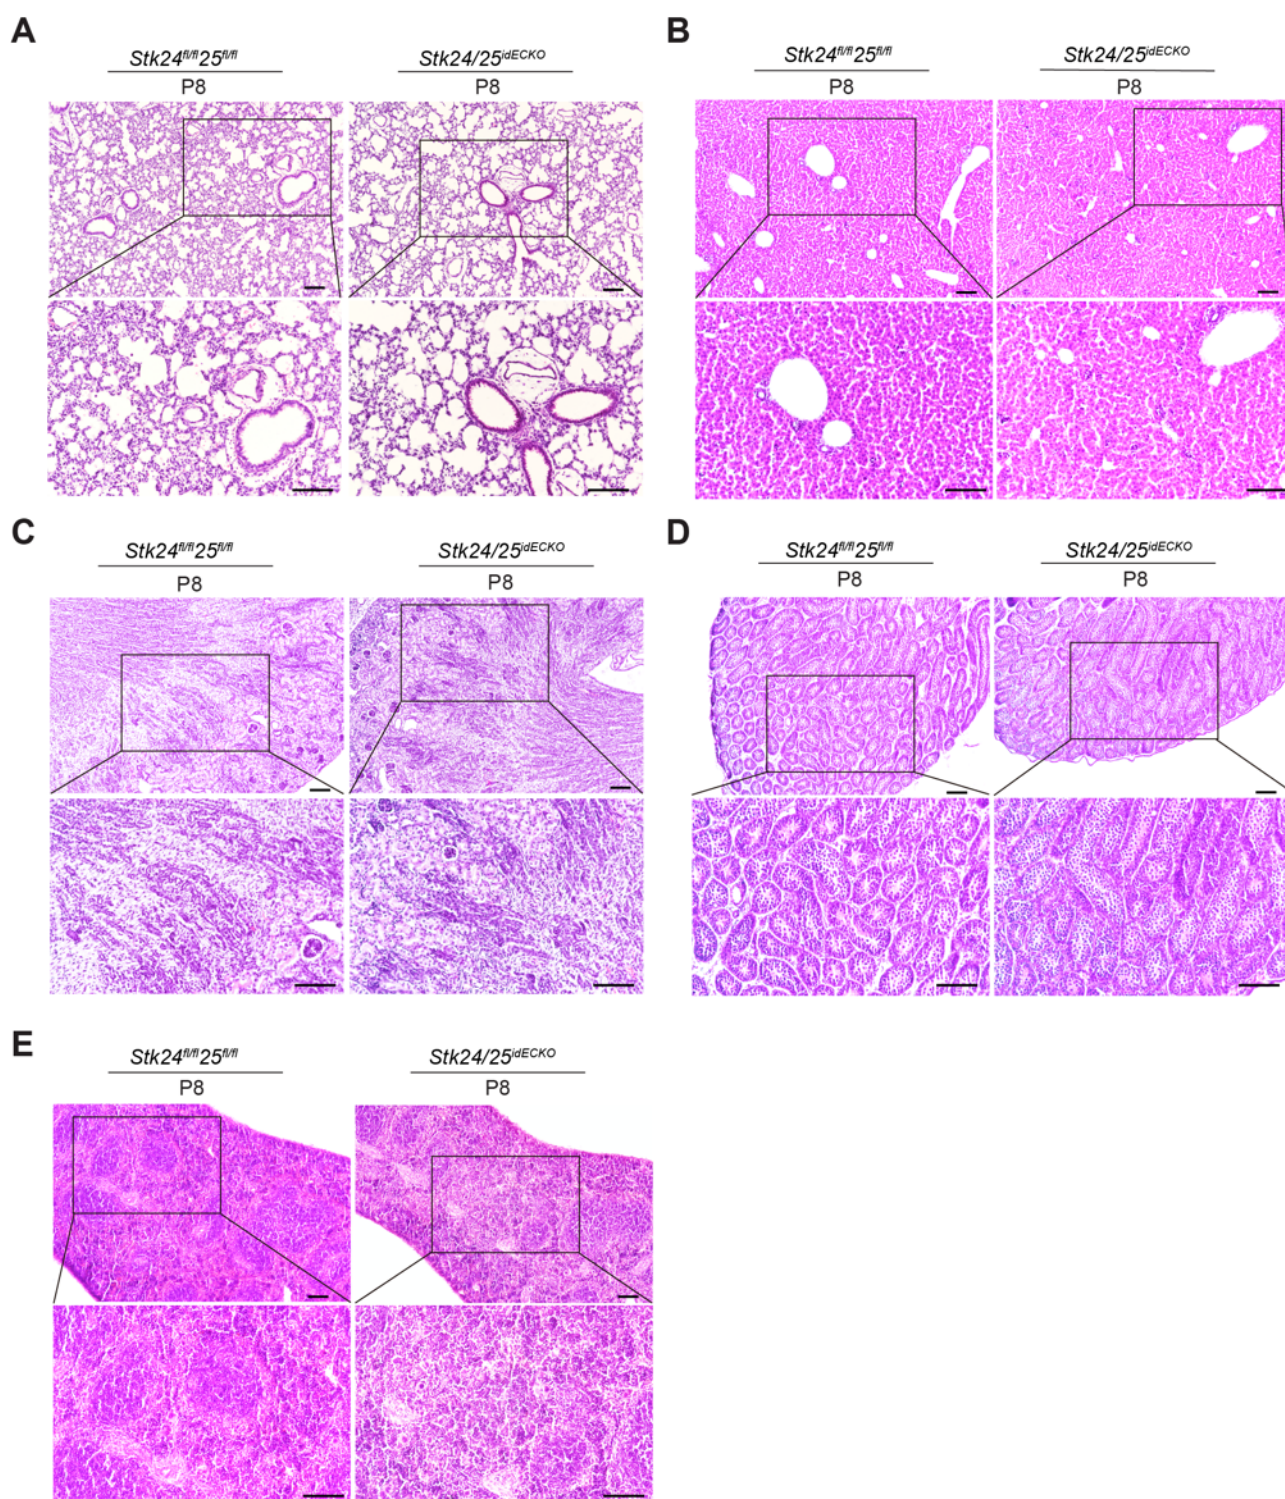

**Fig. S8. H&E staining of peripheral organs in the control and *Stk24/25<sup>idECKO</sup>* mice .** H&E staining images of sections of lung (A), liver (B), kidney (C), testis (D) and spleen (E) show no evidences of hemorrhage or lesions in control and *Stk24/25<sup>idECKO</sup>* mice. Scale bar, 100  $\mu$ m.



## Supplemental Figure 9

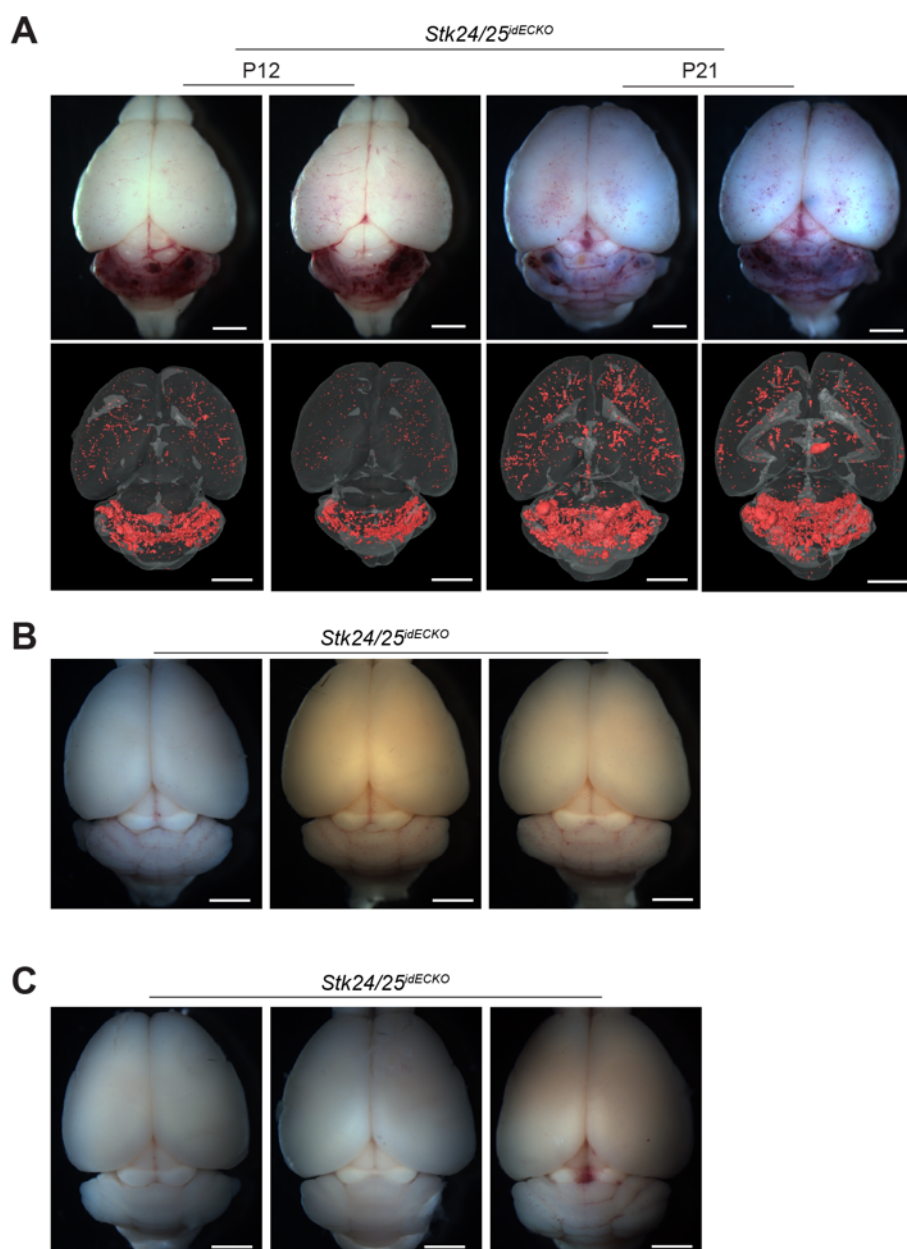

**Fig. S9. Limited induction time window of CCM formation in the *Stk24/25<sup>idECKO</sup>* mice.** **A)** Stereomicroscopic images and micro-CT images of CCM lesions in the *Stk24/25<sup>idECKO</sup>* mice after 4-HT induced deletion at P5. Scale bars, 2 mm. **B)** Stereomicroscopic images and micro-CT images of CCM lesions in *Stk24/25<sup>idECKO</sup>* mice (P30) after induction at P10, P12 and P14. Scale bars, 2 mm. **C)** Stereomicroscopic images and micro-CT images of CCM lesions in the *Stk24/25<sup>idECKO</sup>* mice (P30) after induction at P15, P17 and P19. Scale bars, 2 mm.
